# Supplementary material
Source: PubMed Central journal article supplement (PMC5047068)
Supplement: supp_pp.15.01972_01972_Supplemental_data.pdf [file supp_pp.15.01972_01972_Supplemental_data.pdf]

**A**

| MDCA ( $\mu\text{M}$ ) | Radicle emergence (%) |
|------------------------|-----------------------|
| 0                      | 99.65                 |
| 50                     | 99.32                 |
| 75                     | 98.96                 |
| 100                    | 99.39                 |
| 125                    | 97.03                 |
| 150                    | 98.02                 |
| 175                    | 97.78                 |
| 200                    | 98.10                 |

**B**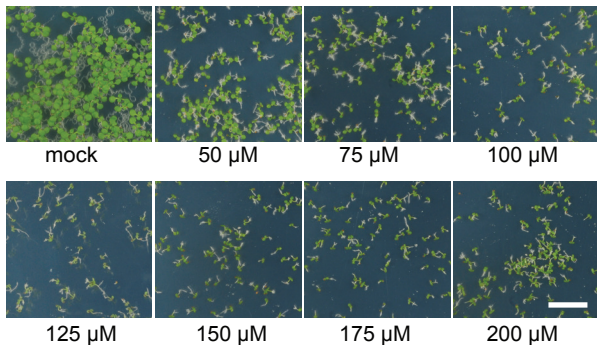

**Figure S1.** Effect of MDCA on germination of Arabidopsis.

(A) Radicle emergence (%) of seeds 2 DAG grown on 0.5xMS-medium supplemented with different concentrations of MDCA ( $n>250$ ) (B) Phenotype of seedlings (12 DAG) grown on 0.5xMS-medium supplemented with different concentrations of MDCA ( $n>250$ ) (scale bar: 0.5 cm).

| Compound<br>Top-10 UP                                   | Retention<br>time (min) | m/z    | mock    |          | 10 $\mu$ M MDCA |          | Fold change<br>MDCA/mock |
|---------------------------------------------------------|-------------------------|--------|---------|----------|-----------------|----------|--------------------------|
|                                                         |                         |        | Average | St. Dev. | Average         | St. Dev. |                          |
| 1. Cinnamoyl aspartate 1                                | 10.21                   | 262.07 | 0       | 0        | 168011          | 30020    | UP                       |
| 2. MDCA glutamate 1                                     | 8.93                    | 320.07 | 0       | 0        | 147087          | 27639    | UP                       |
| 3. MDCA aspartate 1                                     | 8.30                    | 306.06 | 82      | 49       | 130729          | 34993    | 1596.7                   |
| 4. Cinnamoyl aspartate 2                                | 7.49                    | 262.07 | 1       | 2        | 76376           | 17493    | 99852.9                  |
| 5. MDCA aspartate 2                                     | 10.09                   | 306.06 | 1258    | 806      | 64036           | 18981    | 50.9                     |
| 6. MDCA glutamate 2                                     | 10.76                   | 320.07 | 0       | 0        | 49309           | 7942     | UP                       |
| 7. <i>Unknown</i>                                       | 7.17                    | 319.09 | 0       | 0        | 28905           | 10706    | UP                       |
| 8. Cinnamoyl glutamate                                  | 10.96                   | 276.08 | 0       | 0        | 27728           | 3120     | UP                       |
| 9. Cinnamoyl aspartate 1 (fragment)                     | 10.22                   | 218.08 | 0       | 0        | 27331           | 5474     | UP                       |
| 10. MDCA aspartate 2 (heterodimer)                      | 8.32                    | 900.23 | 0       | 0        | 23111           | 5081     | UP                       |
| <b>Compound<br/>Top-10 DOWN</b>                         |                         |        |         |          |                 |          |                          |
| 1. 4-methylthio- <i>N</i> -butyl-glucosinolate          | 3.43                    | 420.04 | 298229  | 191900   | 24633           | 22996    | 0.0826                   |
| 2. 1-methoxyindol-3-ylmethyl-glucosinolate              | 8.01                    | 955.15 | 28706   | 17101    | 2325            | 3604     | 0.0810                   |
| 3. G(8- <i>O</i> -4)ferulic acid + hexose + hexose      | 3.10                    | 713.23 | 23577   | 4733     | 1323            | 331      | 0.0561                   |
| 4. G(8- <i>O</i> -4)ferulic acid + hexose + hexose      | 3.22                    | 713.23 | 21304   | 4272     | 1202            | 218      | 0.0564                   |
| 5. 8-methylsulfinyloctyl-glucosinolate                  | 12.92                   | 492.10 | 20774   | 12097    | 845             | 1160     | 0.0407                   |
| 6. Kaempferol + hexose + deoxyhexose                    | 10.00                   | 593.15 | 18628   | 3670     | 388             | 265      | 0.0208                   |
| 7. 5-methylthio- <i>N</i> -pentyl-glucosinolate         | 5.44                    | 434.06 | 17369   | 11795    | 1188            | 1413     | 0.0684                   |
| 8. <i>Unknown</i>                                       | 2.17                    | 338.08 | 12712   | 2986     | 575             | 259      | 0.0453                   |
| 9. Quercetin + hexose + deoxyhexose                     | 8.63                    | 609.15 | 11396   | 2670     | 350             | 353      | 0.0307                   |
| 10. 8-methylthio- <i>N</i> -octyl-glucosinolate (dimer) | 14.10                   | 953.24 | 10038   | 6169     | 184             | 375      | 0.0184                   |

**Figure S2.** Metabolites with an altered abundance in 10  $\mu$ M MDCA-treated Arabidopsis seedlings.

An overview of the top-10 significantly differential compounds with at least a 10-fold increase (UP) or decrease (DOWN) in 10  $\mu$ M MDCA-treated seedlings as compared to mock-treated seedlings (n=6). The top-10 UP defined as those compounds with the highest normalized peak area in MDCA-treated seedlings, whereas the top-10 DOWN were defined as those compounds with the highest normalized peak area in mock-treated seedlings. The retention time is expressed in minutes. For each compound, normalized average peak areas (unitless) of mock- and 10  $\mu$ M MDCA-treated seedlings are given. Peak areas are normalized relative to the dry weight of the pellet remaining after methanol extraction. The term UP implies that a peak could only be detected in 10  $\mu$ M MDCA-treated seedlings and not in mock-treated seedlings.

**A** PA + hexose (formic acid adduct) (5.92 min, m/z 373.075)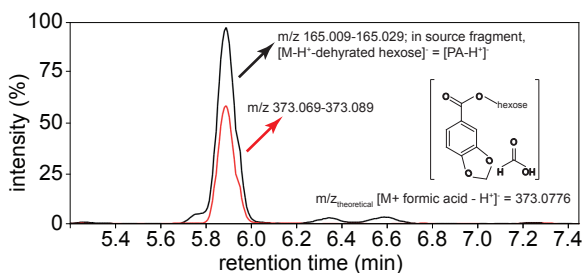**B** MS/MS 165.015@ 5.92 min (in-source fragment of PA + hexose)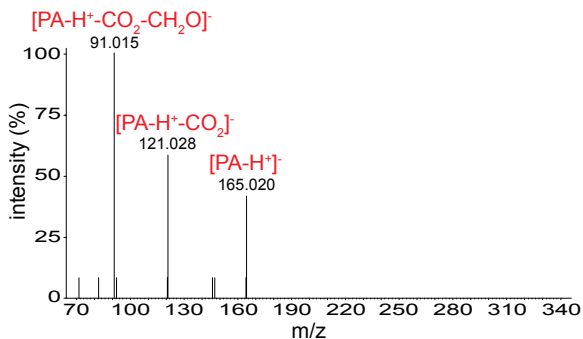**C** PA + malate (9.71 min, m/z 281.027)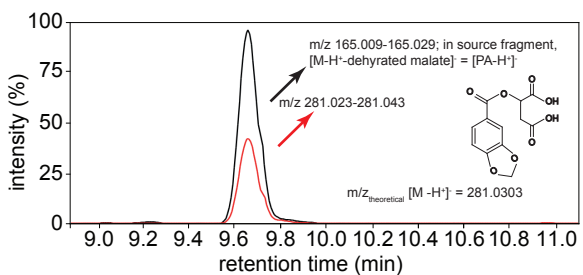**D** MS/MS 165.015@ 9.71 min (in-source fragment of PA + malate)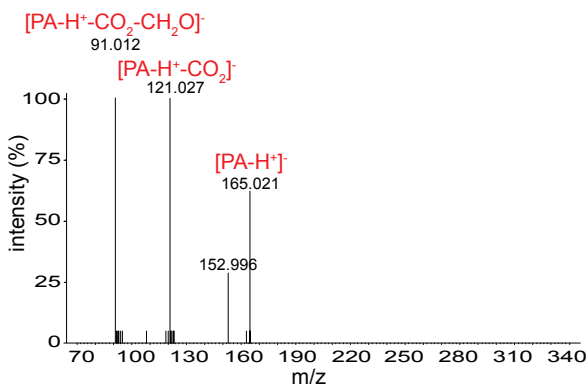

**Figure S3.** UHPLC-MS based detection of PA + hexose and PA + malate in MDCA treated Arabidopsis seedlings.

Structural identification of the compounds was done via accurate m/z match and MS/MS fragmentation spectra. (A) PA + hexose was detected at 5.92 min as formate adduct and as an in-source fragment. (B) The MS/MS of the in-source fragment of PA + hexose with m/z 165.015 eluting at 5.92 min showed characteristic fragmentation pattern of PA. (C) PA + malate was detected at 9.71 min as molecular ion and as an in-source fragment. (D) The MS/MS of the in-source fragment of PA + malate with m/z 165.015 eluting at 9.71 min showed characteristic fragmentation pattern of PA.

| Compound                                      | Retention time (min) | m/z    | mock    |          | 10 $\mu$ M MDCA |          | Fold change MDCA/mock |
|-----------------------------------------------|----------------------|--------|---------|----------|-----------------|----------|-----------------------|
|                                               |                      |        | Average | St. Dev. | Average         | St. Dev. |                       |
| <b>Cinnamic acid derivatives</b>              |                      |        |         |          |                 |          |                       |
| Cinnamoyl hexose (formic acid adduct)         | 9.83                 | 355.10 | 0       | 0        | 10194           | 961      | UP                    |
| Cinnamoyl malate 1                            | 12.66                | 147.04 | 0       | 0        | 905             | 222      | UP                    |
| Cinnamoyl malate 2                            | 14.05                | 147.04 | 1       | 2        | 813             | 197      | 1018.7 <sup>***</sup> |
| <b><i>p</i>-Coumaric acid derivatives</b>     |                      |        |         |          |                 |          |                       |
| <i>p</i> -Coumaric acid 4- <i>O</i> -hexoside | 3.02                 | 325.09 | 138     | 63       | 204             | 91       | 1.4713                |
| <i>p</i> -Coumaroyl hexose 1                  | 4.67                 | 325.09 | 5191    | 1536     | 2969            | 1543     | 0.5720 <sup>*</sup>   |
| <i>p</i> -Coumaroyl hexose 2                  | 5.24                 | 325.09 | 9094    | 1944     | 1379            | 177      | 0.1516 <sup>***</sup> |
| Dihydro- <i>p</i> -coumaric acid + hexose     | 4.03                 | 327.10 | 2437    | 617      | 1156            | 155      | 0.4744 <sup>***</sup> |
| <b>Caffeic acid derivatives</b>               |                      |        |         |          |                 |          |                       |
| Caffeic acid 1                                | 4.90                 | 179.03 | 0       | 0        | 0               | 0        | 0                     |
| Caffeic acid 2                                | 5.80                 | 179.03 | 0       | 0        | 0               | 0        | 0                     |
| Caffeic acid 3/4- <i>O</i> -hexoside 3        | 5.64                 | 341.09 | 778     | 144      | 471             | 94       | 0.6058 <sup>***</sup> |
| Caffeoyl hexose 1                             | 3.45                 | 341.09 | 895     | 680      | 1319            | 292      | 1.4732                |
| Caffeoyl hexose 3/4- <i>O</i> -hexoside 1     | 3.12                 | 503.14 | 115     | 69       | 519             | 124      | 4.5233 <sup>***</sup> |
| Caffeoyl malate 1                             | 5.65                 | 295.05 | 0       | 0        | 0               | 0        | 0                     |
| Caffeoyl malate 2                             | 5.91                 | 295.05 | 0       | 0        | 0               | 0        | 0                     |

| Compound                        | Retention time (min) | m/z    | mock    |          | 10 $\mu$ M MDCA |          | Fold change MDCA/mock |
|---------------------------------|----------------------|--------|---------|----------|-----------------|----------|-----------------------|
|                                 |                      |        | Average | St. Dev. | Average         | St. Dev. |                       |
| <b>Ferulic acid derivatives</b> |                      |        |         |          |                 |          |                       |
| Ferulic acid                    | 9.70                 | 193.05 | 0       | 0        | 0               | 0        | 0                     |
| Feruloyl hexose 1               | 5.49                 | 355.10 | 1887    | 284      | 950             | 271      | 0.5034 <sup>***</sup> |
| Feruloyl hexose 2               | 6.00                 | 355.10 | 161     | 68       | 10              | 19       | 0.0608 <sup>***</sup> |
| Ferulic acid O-4-hexoside       | 3.85                 | 355.10 | 1023    | 288      | 177             | 70       | 0.1733 <sup>***</sup> |
| Feruloyl malate 1               | 9.06                 | 309.06 | 122     | 126      | 26              | 41       | 0.2158                |
| Feruloyl malate 2               | 8.50                 | 309.06 | 0       | 0        | 0               | 0        | 0                     |
| <b>Sinapic acid derivatives</b> |                      |        |         |          |                 |          |                       |
| Sinapic acid                    | 8.41                 | 223.06 | 383     | 180      | 221             | 152      | 0.5772                |
| Sinapoyl hexose 1               | 5.68                 | 385.11 | 113076  | 28191    | 127022          | 27289    | 1.1233                |
| Sinapoyl hexose 2               | 6.24                 | 385.11 | 29797   | 7438     | 37333           | 8502     | 1.2529                |
| Disinapoyl hexose 1             | 15.45                | 591.17 | 5457    | 1221     | 5627            | 1550     | 1.0311                |
| Disinapoyl hexose 2             | 12.00                | 591.17 | 50334   | 10779    | 86872           | 20067    | 1.7259 <sup>**</sup>  |
| Sinapoyl malate 1               | 9.21                 | 339.07 | 96825   | 11845    | 106291          | 20152    | 1.0978                |
| Sinapoyl malate 2               | 9.50                 | 339.07 | 48218   | 5230     | 47620           | 7285     | 0.9876                |
| <b>Varia</b>                    |                      |        |         |          |                 |          |                       |
| Coniferin (formic acid adduct)  | 3.96                 | 387.13 | 78987   | 15739    | 37617           | 4911     | 0.4762 <sup>***</sup> |
| Scopolin (formic acid adduct)   | 4.62                 | 399.09 | 30358   | 8264     | 7413            | 2109     | 0.2442 <sup>***</sup> |

| Compound                                           | Retention time (min) | m/z    | mock    |          | 10 $\mu$ M MDCA |          | Fold change MDCA/mock |
|----------------------------------------------------|----------------------|--------|---------|----------|-----------------|----------|-----------------------|
|                                                    |                      |        | Average | St. Dev. | Average         | St. Dev. |                       |
| <b>Coniferyl alcohol - ferulic acid conjugates</b> |                      |        |         |          |                 |          |                       |
| G(8-O-4) ferulic acid                              | 8.96                 | 389.12 | 2262    | 472      | 2060            | 569      | 0.9106                |
| G(8-O-4) ferulic acid + hexose 1                   | 6.09                 | 551.18 | 1540    | 361      | 1345            | 265      | 0.8729                |
| G(8-O-4) ferulic acid + hexose 2                   | 6.21                 | 551.18 | 1350    | 205      | 335             | 121      | 0.2479***             |
| G(8-O-4) ferulic acid + hexose 3                   | 6.59                 | 551.18 | 13461   | 2904     | 23014           | 2409     | 1.7098***             |
| G(8-O-4) ferulic acid + hexose 4                   | 6.86                 | 551.18 | 3802    | 965      | 3080            | 366      | 0.8101                |
| G(8-O-4) ferulic acid + hexose 5                   | 7.14                 | 551.18 | 3313    | 670      | 3432            | 639      | 1.0359                |
| G(8-O-4) ferulic acid + hexose 6                   | 7.49                 | 551.18 | 3421    | 602      | 760             | 201      | 0.2221***             |
| G(8-O-4) ferulic acid + malate 1                   | 9.58                 | 505.14 | 2578    | 304      | 1593            | 429      | 0.6178**              |
| G(8-O-4) ferulic acid + malate 2                   | 9.83                 | 505.13 | 1967    | 309      | 1328            | 433      | 0.6748*               |
| G(8-O-4) ferulic acid + malate 3                   | 10.43                | 505.13 | 1084    | 234      | 247             | 163      | 0.2275***             |
| G(8-O-4) ferulic acid + malate 4                   | 10.63                | 505.13 | 1497    | 209      | 575             | 187      | 0.3841***             |
| G(8-O-4) ferulic acid + 224 Da 1                   | 11.95                | 775.25 | 3434    | 581      | 154             | 88       | 0.0448***             |
| G(8-O-4) ferulic acid + 224 Da 2                   | 12.11                | 775.25 | 2661    | 519      | 144             | 92       | 0.0542***             |
| G(8-5) feruloyl hexose 1                           | 9.79                 | 533.17 | 1229    | 302      | 100             | 96       | 0.0814***             |
| G(8-5) feruloyl hexose 2                           | 10.32                | 533.17 | 4024    | 731      | 986             | 255      | 0.2451***             |
| G(8-5) feruloyl hexose 3                           | 11.11                | 533.17 | 558     | 182      | 232             | 87       | 0.4154*               |
| G(8-5) feruloyl malate                             | 14.01                | 487.12 | 2865    | 640      | 1401            | 358      | 0.4891**              |
| G(8-5) feruloyl malate O-4-hexoside 1              | 10.36                | 649.18 | 3118    | 310      | 995             | 341      | 0.3190***             |
| G(8-5) feruloyl malate O-4-hexoside 2              | 9.99                 | 649.17 | 119     | 46       | 65              | 61       | 0.5487                |

| Compound                                  | Retention time (min) | m/z    | mock    |          | 10 $\mu$ M MDCA |          | Fold change MDCA/mock |
|-------------------------------------------|----------------------|--------|---------|----------|-----------------|----------|-----------------------|
|                                           |                      |        | Average | St. Dev. | Average         | St. Dev. |                       |
| <b>Hexosylated oligolignols</b>           |                      |        |         |          |                 |          |                       |
| G(8-5)G + hexose                          | 9.36                 | 519.19 | 2618    | 514      | 361             | 158      | 0.1380***             |
| G 4-O-hexoside(8-5)G                      | 10.94                | 519.19 | 2914    | 430      | 529             | 101      | 0.1814***             |
| G(red8-5)G + hexose                       | 8.41                 | 521.20 | 4768    | 616      | 1015            | 227      | 0.2128***             |
| G(red8-8)G 8/4-O-hexoside                 | 9.26                 | 521.20 | 1779    | 362      | 96              | 44       | 0.0542***             |
| G(8-8)G hexoside 1                        | 10.60                | 519.19 | 5654    | 886      | 2304            | 290      | 0.4075***             |
| G(8-8)G hexoside 2                        | 10.73                | 519.19 | 1620    | 326      | 3               | 7        | 0.0017***             |
| G(8-8)G + hexose + hexose                 | 7.26                 | 681.24 | 2613    | 429      | 2640            | 487      | 1.0102                |
| G(8-O-4)G(red8-5)G + hexose 1             | 10.20                | 717.28 | 2550    | 317      | 0               | 0        | 0.0000                |
| G(8-O-4)G(red8-5)G + hexose 2             | 9.90                 | 717.28 | 2916    | 263      | 225             | 109      | 0.0772***             |
| <b>Flavonol glycosides</b>                |                      |        |         |          |                 |          |                       |
| Isorhamnetin + hexose + deoxyhexose       | 7.11                 | 623.16 | 1113    | 280      | 44              | 49       | 0.0394***             |
| Isorhamnetin-3-O-rhamnoside-7-O-glucoside | 8.68                 | 623.16 | 38053   | 5356     | 16368           | 3157     | 0.4301***             |
| Isorhamnetin + deoxyhexose + deoxyhexose  | 10.00                | 607.17 | 1546    | 309      | 1248            | 406      | 0.8070                |
| Isorhamnetin + hexose + deoxyhexose       | 10.37                | 623.16 | 2872    | 792      | 11              | 26       | 0.0037***             |

| Compound                                                  | Retention m/z |        | mock    |          | 10 $\mu$ M MDCA |          | Fold change MDCA/mock |
|-----------------------------------------------------------|---------------|--------|---------|----------|-----------------|----------|-----------------------|
|                                                           | time (min)    |        | Average | St. Dev. | Average         | St. Dev. |                       |
| <b>Flavonol glycosides</b>                                |               |        |         |          |                 |          |                       |
| Kaempferol-3-O-rhamnosyl(1-->2)-glucoside -7-O-rhamnoside | 6.40          | 739.21 | 87791   | 19898    | 90604           | 19866    | 1.0320                |
| Kaempferol + deoxyhexose + deoxyhexose                    | 6.72          | 593.15 | 11145   | 2022     | 9680            | 2755     | 0.8685                |
| Kaempferol + hexose + hexose+ deoxyhexose                 | 7.78          | 755.21 | 1447    | 313      | 2016            | 467      | 1.3932 <sup>*</sup>   |
| Kaempferol-3-O-rhamnoside-7-O-glucoside                   | 8.35          | 593.15 | 92912   | 14139    | 65835           | 16130    | 0.7086 <sup>**</sup>  |
| Kaempferol + hexose + deoxyhexose + deoxyhexose           | 8.93          | 739.21 | 1038    | 130      | 389             | 323      | 0.3747 <sup>**</sup>  |
| Kaempferol-3-O-rhamnoside-7-O-rhamnoside                  | 9.65          | 577.16 | 84357   | 10126    | 90086           | 20830    | 1.0679                |
| Kaempferol + hexose + deoxyhexose                         | 10.01         | 593.15 | 18628   | 3670     | 388             | 265      | 0.0208 <sup>***</sup> |
| Kaempferol + hexose                                       | 10.41         | 447.09 | 9313    | 2054     | 360             | 699      | 0.0386 <sup>***</sup> |
| Kaempferol + deoxyhexose                                  | 12.20         | 431.10 | 1848    | 351      | 62              | 83       | 0.0338 <sup>***</sup> |
| Kaempferol + deoxyhexose                                  | 14.97         | 431.10 | 3917    | 721      | 1927            | 966      | 0.4919                |
| Quercetin + hexose + deoxyhexose                          | 5.65          | 609.15 | 4509    | 947      | 1805            | 940      | 0.4003 <sup>**</sup>  |
| Quercetin-3-O-rhamnosyl(1-->2)-glucoside -7-O-rhamnoside  | 7.72          | 755.21 | 23472   | 3643     | 14762           | 3284     | 0.6289 <sup>**</sup>  |
| Quercetin + hexose + hexose+ deoxyhexose                  | 6.54          | 771.20 | 3301    | 602      | 226             | 142      | 0.0683 <sup>***</sup> |
| Quercetin + hexose + deoxyhexose + deoxyhexose            | 7.17          | 755.21 | 9702    | 1770     | 4929            | 1274     | 0.5080 <sup>**</sup>  |
| Quercetin-3-O-rhamnoside-7-O-glucoside                    | 7.23          | 609.15 | 64027   | 13075    | 43735           | 8181     | 0.6831 <sup>*</sup>   |
| Quercetin + hexose + deoxyhexose                          | 8.63          | 609.15 | 11396   | 2670     | 350             | 353      | 0.0307 <sup>***</sup> |
| Quercetin + deoxyhexose                                   | 12.72         | 447.09 | 2578    | 666      | 194             | 226      | 0.0754 <sup>***</sup> |

**Figure S4.** Metabolites with an altered abundance in 10  $\mu$ M MDCA-treated Arabidopsis seedlings.

A targeted approach was used to investigate which of the identified compounds are altered in 10  $\mu$ M MDCA-treated seedlings in comparison with mock-treated seedlings (n=6). For each compound, normalized average peak areas (unitless) of mock- and 10  $\mu$ M MDCA-treated seedlings are given. Peak areas are normalized relative to the dry weight of the pellet remaining after methanol extraction. The retention time is expressed in minutes. Asterisks represent significant differences between 10  $\mu$ M MDCA-treated and mock-treated plants as determined by Dunnett's test. Dunnett's test P-values: <sup>\*</sup>0.001  $\leq$  P < 0.05, <sup>\*\*</sup>0.0001  $\leq$  P < 0.001, <sup>\*\*\*</sup> P < 0.0001. The term UP implies that the compound could only be detected in 10  $\mu$ M MDCA-treated seedlings and not in mock-treated seedlings.



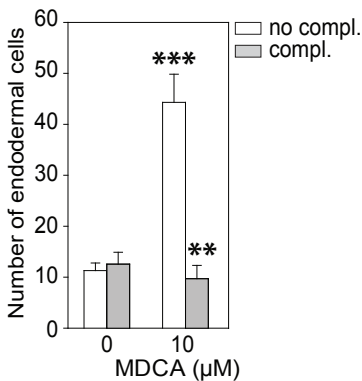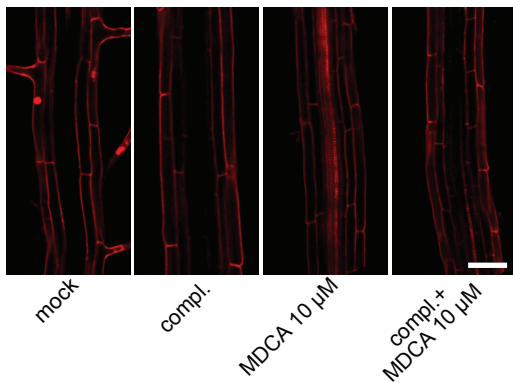

**Figure S5.** The impact of the MDCA-induced lignin reduction on the plant phenotype.

Visualization of the effect of MDCA treatment on the Casparian strip formation (white; no compl.) in *Arabidopsis* seedlings 5 DAG and complementation by exogenous application of two monolignols (grey; compl.): 50 µM of each coniferyl alcohol and sinapyl alcohol, which allows for the formation of a functional Casparian strip (n=10). See manuscript for additional explanation on this experiment. Error bars represent standard deviations and asterisks were used to indicate statistically significant differences compared to the corresponding mock-treated control sample as determined by Dunnett's test P-values: \*P < 0.05, \*\*P < 0.001, \*\*\* P < 0.0001. (B)

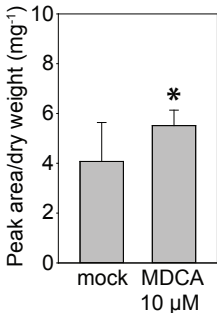

**Figure S6.** Detection of salicylic acid in 10  $\mu\text{M}$  MDCA-treated *Arabidopsis* seedlings.

The average peak area of salicylic acid (SA) in mock- and 10  $\mu\text{M}$  MDCA-treated seedlings 12 DAG ( $n=10$ ). The unitless peak areas were normalized to the dry weight of the pellet remaining after methanol extraction (in mg). Error bars represent standard deviations. The asterisk represents significant difference in SA levels between 10  $\mu\text{M}$  MDCA-treated and mock-treated plants ( $0.01 < P\text{-value} < 0.05$ ) as determined by Dunnett's test.

**A**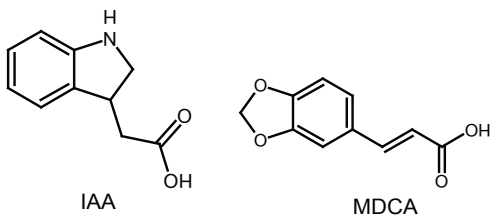**B**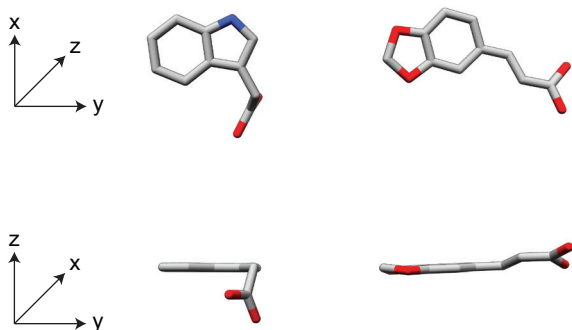**C**

| Physiochemical Properties          | IAA     | MDCA   |
|------------------------------------|---------|--------|
| MM                                 | 175.186 | 192.17 |
| pKa                                | 4.66    | 3.55   |
| cLogP([octanol]/[water]) partition | 1.1822  | 1.5853 |
| #H-acceptors                       | 3       | 4      |
| #H-donors                          | 2       | 1      |
| Total surface area                 | 166     | 168    |
| Polar surface area                 | 53.09   | 55.76  |
| Rotable bonds                      | 2       | 2      |
| Aromatic rings                     | 2       | 1      |

**D**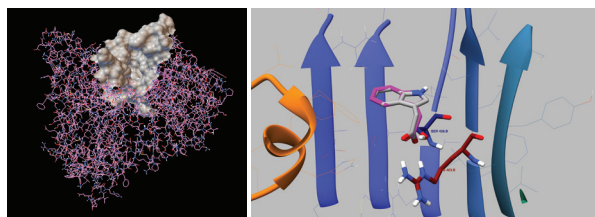**E**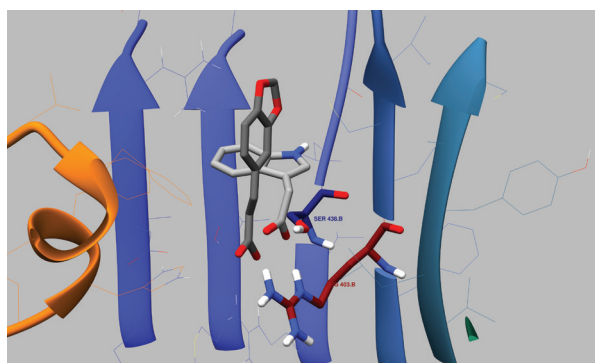

**Figure S7.** Chemical and physical characteristics and docking of MDCA for TIR1.

(A) The molecular structure of IAA and MDCA. (B) Top view of energy minimized structures represented as sticks with bicyclic ring structures planar. The IAA carboxylic acid group does not position in the plane of the aromatic ring, whilst for MDCA, the carboxylic acid is fixed planar to the ring due to the trans-alkene bond. (C) Physiochemical properties of IAA and MDCA. (D) The binding pocket of TIR1 shown as a surface representation in relation to the whole structure whereby the binding region is defined as an 18Å x 18Å x 18Å box. Docking of IAA from the crystal structure (purple) with that of the docked result (grey) showed almost identical and superimposable results. (E) The best possible pose for MDCA in the lower region of the TIR1 pocket.

|                                       | mock             | MDCA 5 $\mu$ M    | MDCA 10 $\mu$ M      |
|---------------------------------------|------------------|-------------------|----------------------|
| Indole-3-acetic acid (IAA)            | 15.5 (2.50)      | 20.60 (2.30) *    | 27.80 (2.60) ***     |
| <b><i>Precursors</i></b>              |                  |                   |                      |
| Anthranilate                          | 26.50 (6.4)      | 36.50 (7.80)      | 38.10 (9.30)         |
| Tryptophan                            | 2170.90 (508.90) | 2202.90 (389.10)  | 3038.50 (648.90)     |
| Tryptamine                            | 0.18 (0.05)      | 0.28 (0.07) *     | 0.30 (0.08) *        |
| Indole-3-acetamide                    | 1.13 (0.26)      | 1.86 (0.37) **    | 2.71 (0.61) ***      |
| Indole-3-acetonitrile                 | 388.30 (79.50)   | 592.70 (126.70) * | 1009.80 (189.10) *** |
| Indole-3-acetaldoxime                 | 12.50 (2.40)     | 16.90 (3.00) *    | 20.20 (3.40) **      |
| Indole-3-acetaldehyde                 | 95.30 (24.60)    | 126.00 (20.80)    | 160.00 (43.10) *     |
| Indole-3-pyruvic acid                 | 129.50 (15.30)   | 121.50 (22.60)    | 149.00 (39.00)       |
| <b><i>Conjugates, catabolites</i></b> |                  |                   |                      |
| 2-oxindole-3-acetic acid              | 109.17 (26.10)   | 113.80 (20.22)    | 149.36 (26.82) *     |
| IAA-glutamate                         | 0.94 (0.16)      | 1.66 (0.36) **    | 2.24 (0.28) ***      |
| IAA-aspartate                         | 0.85 (0.20)      | 1.70 (0.37) **    | 2.66 (0.62) ***      |

**Figure S8.** Concentration of auxin and auxin metabolites after MDCA treatment of Arabidopsis seedlings.

The concentration of free IAA, IAA-precursors, IAA-amino acid conjugates and catabolites in seedlings (12 DAG) grown on 0.5xMS-medium supplemented with MDCA (5  $\mu$ M and 10  $\mu$ M). Each biological replicate represents ten seedlings that were pooled and analyzed (n=6). Standard deviations are mentioned inbetween brackets and asterisks represent statistically significant differences between MDCA-treated and mock-treated plants as determined by Dunnett's test. P-values: \*P < 0.05, \*\*P < 0.001, \*\*\* P < 0.0001.

|                                | WT              | <i>ref3-2</i> mutant |
|--------------------------------|-----------------|----------------------|
| Indole-3-acetic acid (IAA)     | 9.1 (0.7)       | 13.3 (1.9) ***       |
| <b>Precursors</b>              |                 |                      |
| Anthranilate                   | 26.8 (7.4)      | 15.6 (2.6) **        |
| Tryptophan                     | 5251.3 (1083.3) | 4300.4 (1037.8)      |
| Tryptamine                     | 1.0 (0.3)       | 1.1 (0.2)            |
| Indole-3-acetamide             | 1.2 (0.3)       | 2.2 (0.5) **         |
| Indole-3-acetonitrile          | 333.1 (117.8)   | 578.2 (71.1) **      |
| Indole-3-acetaldoxime          | 7.5 (1.4)       | 4.0 (0.9) ***        |
| Indole-3-acetaldehyde          | 69.8 (10.7)     | 126.7 (42.7) *       |
| Indole-3-pyruvic acid          | 218 (42)        | 344 (87) **          |
| <b>Conjugates, catabolites</b> |                 |                      |
| 2-oxindole-3-acetic acid       | 65.2 (15.6)     | 93.4 (20.0) *        |
| IAA-glutamate                  | 2.5 (0.6)       | 9.5 (2.1) ***        |
| IAA-aspartate                  | 6.5 (1.8)       | 72.8 (13.9) ***      |

**Figure S9.** Concentration of auxin and auxin metabolites in the *c4h* mutant *ref3-2*.

The concentration of free IAA, IAA-precursors, IAA-amino acid conjugates and catabolites in the leaves of 2 months old *ref3-2* plants. Each biological replicate represents one plant (n=6). Standard deviations are mentioned inbetween brackets and asterisks represent statistically significant differences between wild type (WT) and *c4h* mutant *ref3-2* plants as determined by Dunnett's test. P-values: \*P < 0.05, \*\*P < 0.001, \*\*\* P <0.0001.

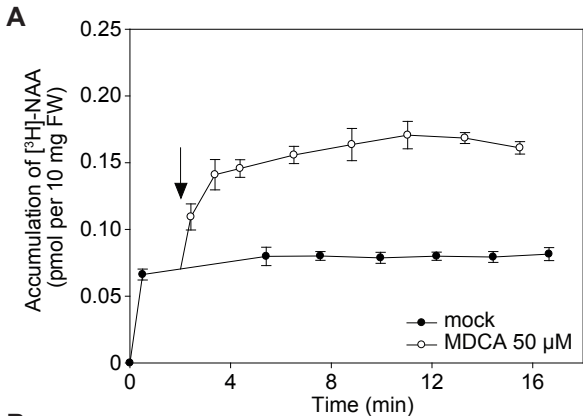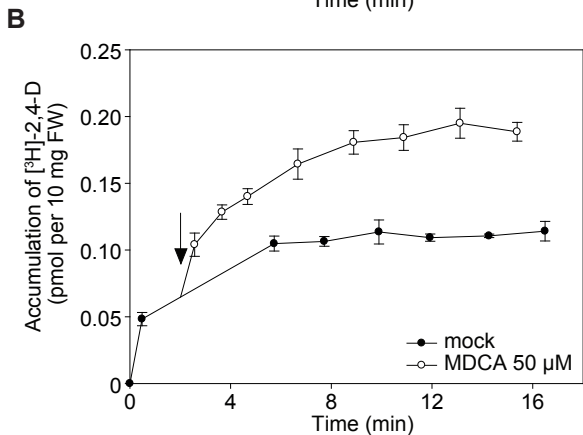

**Figure S10.** The impact of MDCA on auxin transport in suspension-grown Arabidopsis T87 cells.

(A-B) Effect of MDCA on the net accumulation of (A) [<sup>3</sup>H]-NAA or (B) [<sup>3</sup>H]-2,4-D in four-day old suspension-grown Arabidopsis cells (20 minute uptake period). Arrows point at time of application of MDCA. Error bars in (A-B) represent standard deviations (n=4).
